# Supplementary material for: Radiocarbon analysis of elemental and organic carbon in Switzerland during winter-smog episodes from 2008 to 2012 – Part 1: Source apportionment and spatial variability
Source: Copernicus journal article supplement (doi:10.5194/acp-14-13551-2014), 2014-12-19
Supplement: Supplementary file 1 [file acp-14-13551-2014-supplement.pdf]

Supplement of Atmos. Chem. Phys., 14, 13551–13570, 2014  
<http://www.atmos-chem-phys.net/14/13551/2014/>  
doi:10.5194/acp-14-13551-2014-supplement  
© Author(s) 2014. CC Attribution 3.0 License.

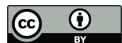

Atmospheric  
Chemistry  
and Physics  
Open Access

The logo for the journal Atmospheric Chemistry and Physics, featuring the letters 'EG' inside a stylized globe.

*Supplement of*

**Radiocarbon analysis of elemental and organic carbon in Switzerland during winter-smog episodes from 2008 to 2012 – Part 1: Source apportionment and spatial variability**

**P. Zotter et al.**

*Correspondence to:* A. S. H. Prévôt ([andre.prevot@psi.ch](mailto:andre.prevot@psi.ch))

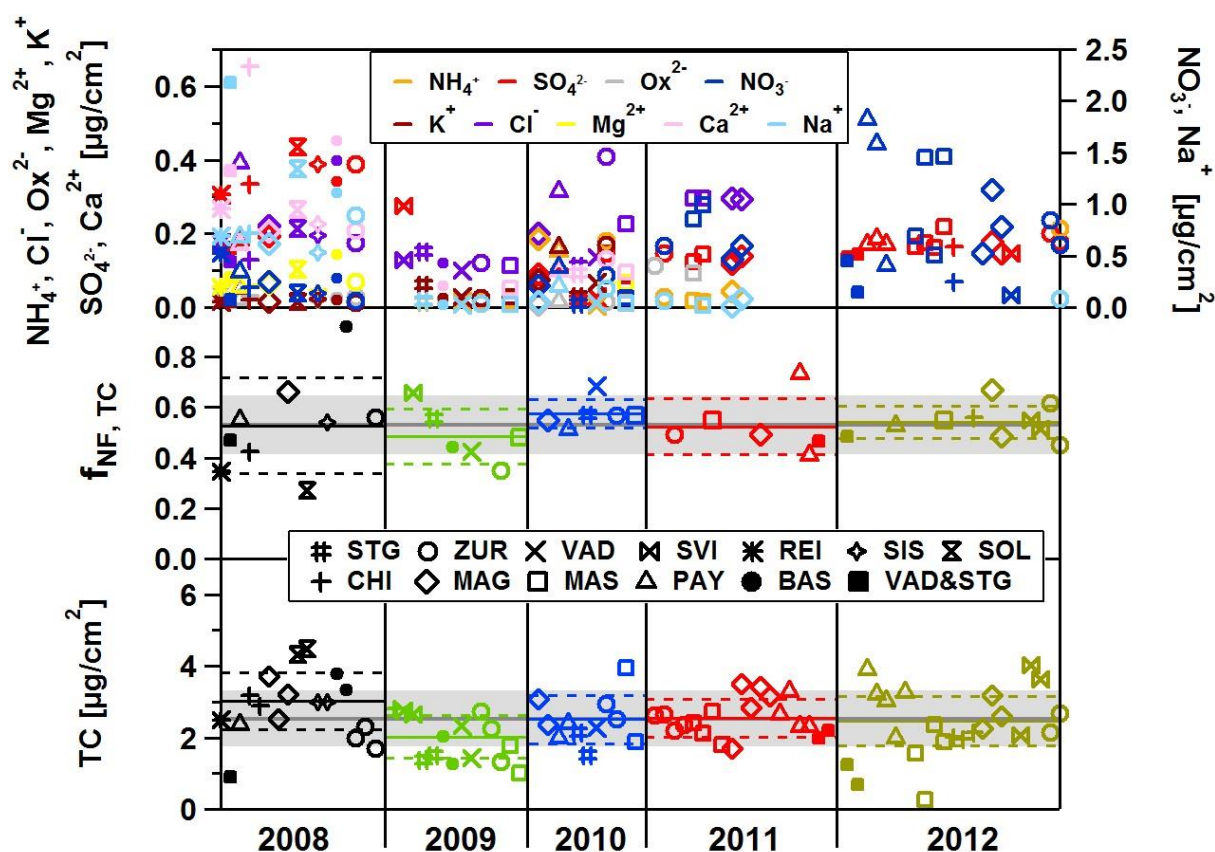

Figure S1: Results of all blank measurements. 34 blank filters were analyzed for  $^{14}\text{C}$  in TC, 45 for major ions and 47 for the TC mass loading. Multiple results from the same station for TC represent not only different blank filters but also repeated measurements. Only for some stations (2008: two for MAG and ZUR; 2009: two for ZUR; 2011: two for MAS, ZUR and PAY as well as three for MAG; 2012: two for the combined blank of VAD and STG, MAG and SVI as well as three for PAY and MAS) TC mass was measured on more than one blank filter per year. Multiple blank results for the same station for the major ionic species refer to different blank filters, whereas multiple  $^{14}\text{C}$  blank results represent only repeated measurements of the same blank filter. On the blank filters from the winter 2011/2012, with one exception, only nitrate and sulfate were above the detection limit. The solid and dashed colored horizontal lines in the lower and middle panel represent the annual mean and standard deviation, respectively. The solid grey line and shaded area denote the average and standard deviation over all blanks (different stations and years).

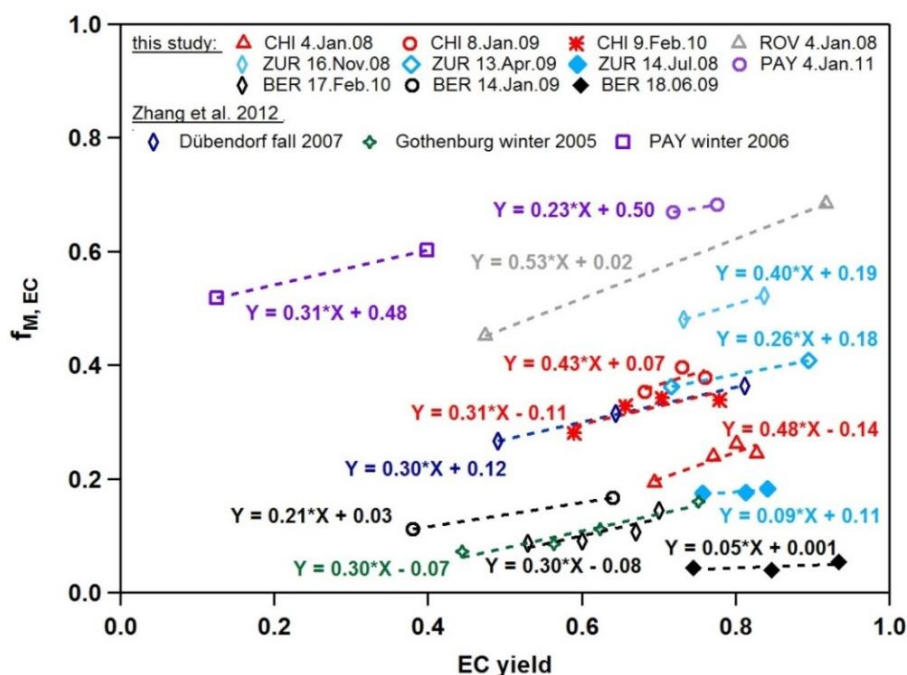

Figure S2:  $f_{M,EC}$  as a function of EC yield. The open symbols represent winter samples whereas the filled ones denote filters from summer. The uncertainty for the EC yield was assumed to be 10% (see Sect. 2.3.2) and the one for  $f_{M,EC}$  is on average ~2% (see Sect. 2.3.1 in the main text). An orthogonal distance regression was used to fit the data.

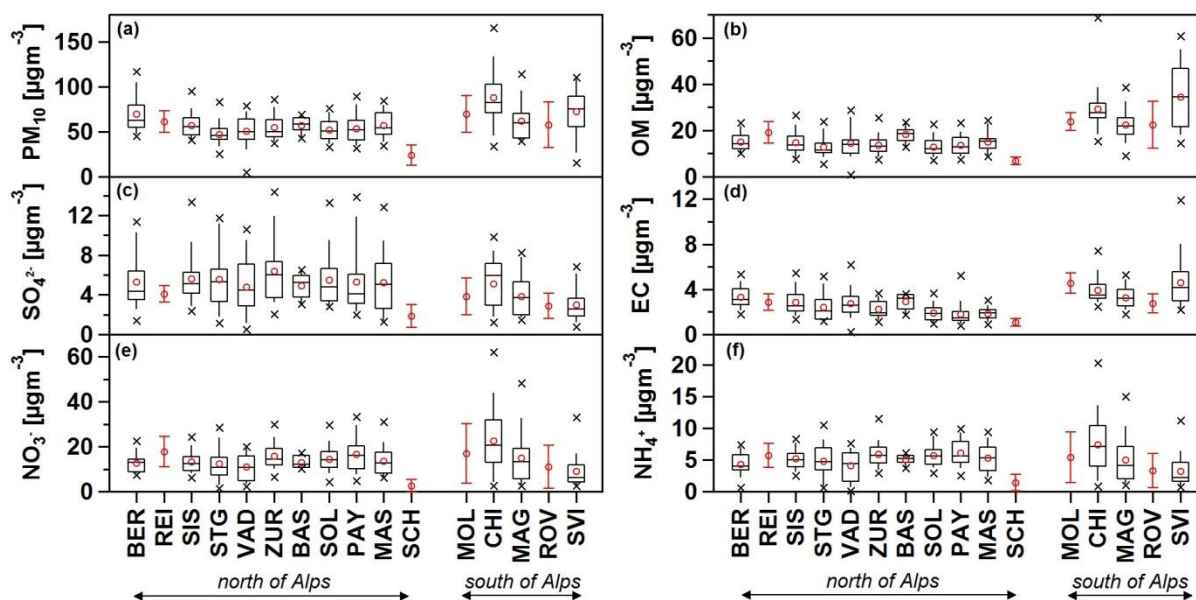

Figure S3. Whisker box plots of the absolute concentrations of the major constituents of  $PM_{10}$  from all analyzed winter samples. The open red circles represent the mean and the black crosses the max. and min. values. Stations north and south of the Alps are sorted from the left to the right from the nominal most traffic traffic-influenced station to the most rural one (see Table 1 in the main text.). Data from the yearly cycle in ZUR are excluded. Only averages  $\pm$  standard deviations are displayed for stations from which only filters from one winter were analyzed.

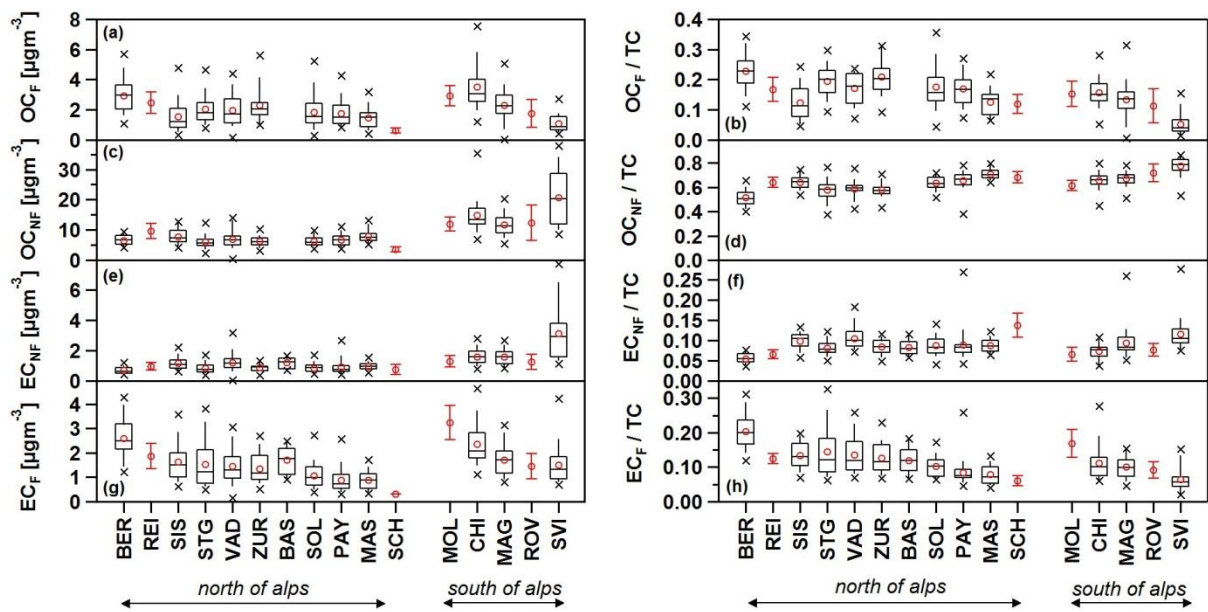

**Figure S4:** Whisker box plots of the fossil and non-fossil EC and OC absolute concentrations and their relative contribution to TC from all analyzed winter samples ( $n \sim 300$ ). The open red circles represent the mean and the black crosses the max. and min. values. Stations north and south of the Alps are sorted from the left to the right from the nominal most traffic traffic-influenced station to the most rural one (see Table 1 in the main text.).  $\text{OC}_{\text{NF}}$  values from BAS and all data from the yearly cycle in ZUR are excluded (see Sect. 3.2.1 and Sect. 1). Only averages  $\pm$  standard deviations are displayed for stations from which only filters from one winter were analyzed.

**Table S1: Overview of all days which were chosen for the analysis.**

| winter         | location             | day 1           | day 2                        | day 3                         | day 4           | day 5                        | Zürich yearly cycle                                                                         |
|----------------|----------------------|-----------------|------------------------------|-------------------------------|-----------------|------------------------------|---------------------------------------------------------------------------------------------|
| 2007/<br>2008* | north of<br>the Alps | 04.Jan.<br>2008 | 30.Jan.<br>2008 <sup>†</sup> | 13.Feb.<br>2008               | 15.Feb.<br>2008 | 19.Feb.<br>2008              |                                                                                             |
|                | south of<br>the Alps | 4.Jan.<br>2008  | 30.Jan.<br>2008              | 1.Feb.<br>2008                | 23.Feb.<br>2008 | 25.Feb.<br>2008              |                                                                                             |
| 2008/<br>2009  | north of<br>the Alps | 29.Dec.<br>2008 | 8.Jan.<br>2009               | 14.Jan.<br>2009               | 28.Jan.<br>2009 | 3.Feb.<br>2009               |                                                                                             |
|                | south of<br>the Alps | 8.Jan.<br>2009  | 14.Jan.<br>2009              | 3.Feb.<br>2009                | 23.Feb.<br>2009 | 1.Mar.<br>2009 <sup>#</sup>  | 12. Aug.08;<br>5., 9. & 25. Sep.08;<br>15. Oct.08;<br>8. & 16. Nov.08;<br>18. & 29. Dec.08; |
| 2009/<br>2010  | north of<br>the Alps | 12.Jan.<br>2010 | 24.Jan.<br>2010              | 11.Feb.<br>2010 <sup>##</sup> | 13.Feb.<br>2010 | 17.Feb.<br>2010              | 15. & 27. Jan.09;<br>4.Feb.09;                                                              |
|                | south of<br>the Alps | 18.Jan.<br>2010 | 22.Jan.<br>2010              | 26.Jan.<br>2010               | 9.Feb.<br>2010  | 15.Feb.<br>2010              | 4. u. 16. Mar.09;<br>1., 13. & 21. Apr.09;<br>7. & 19 May 09;                               |
| 2010/<br>2011  | north of<br>the Alps | 4.Jan.<br>2011  | 30.Jan.<br>2011              | 3.Feb.<br>2011                | 19.Feb.<br>2011 | 5.Mar.<br>2011 <sup>**</sup> | 12. Jun.09;<br>2., 14. & 30.Jul.09                                                          |
|                | south of<br>the Alps | 2.Jan.<br>2011  | 26.Jan.<br>2011              | 11.Feb.<br>2011               | 13.Feb.<br>2011 | 25.Feb.<br>2011              |                                                                                             |
| 2011/<br>2012  | north of<br>the Alps | 30.Jan.<br>2012 | 7.Feb.<br>2012               | 9.Feb.<br>2012                | 13.Feb.<br>2012 | 23.Feb.<br>2012              |                                                                                             |
|                | south of<br>the Alps | 11.Dec.<br>2011 | 16.Jan.<br>2012              | 18.Jan.<br>2012               | 11.Feb.<br>2012 | 13.Feb.<br>2012              |                                                                                             |
| 2012/<br>2013  | Bern                 | 18.Jan.<br>2013 | 26.Jan.<br>2013              | 14.Feb.<br>2013               | 26.Feb.<br>2013 | 5.Mar.<br>2013               |                                                                                             |

\*<sup>14</sup>C in OC for all stations north of the Alps was also measured for a 6<sup>th</sup> day (11. Feb. 2008). For SVI only 2 filters, 14<sup>th</sup> & 26<sup>th</sup> December 2007 were analyzed. <sup>14</sup>C analysis in TC for 26<sup>th</sup> December 2007 from SVI and calculation of EC<sub>NF</sub> (EC<sub>NF</sub> = (TC<sub>NF</sub> \* TC – OC<sub>NF</sub> \* OC) / EC Szidat et al., 2004) since not enough filter material for the <sup>14</sup>C analysis of EC was left.

<sup>#</sup>Filter from 1<sup>st</sup> of March 2009 from SVI was not available and 3<sup>rd</sup> of March 2009 was analyzed instead

<sup>†</sup>Filter from 11<sup>th</sup> of February 2008 was used for the <sup>14</sup>C analysis of EC for STG since not enough filter material was available from 13<sup>th</sup> of February 2008

<sup>\*\*</sup>Filter from 5<sup>th</sup> of March 2011 from VAD was not available and 3<sup>rd</sup> of March 2011 was analyzed instead

<sup>##</sup>Filter from 9<sup>th</sup> of February 2010 from BER was analyzed instead of 11<sup>th</sup> of February 2010

**Table S2: Compilation of the average blank values from the different measured compounds used for the blank subtraction (see Sect. 2.3.2 in the main text). Not all major water-soluble ions were detected on all blank filters. Yearly averages were only calculated if the individual components were detected on more than two blanks.**

| component                           | 2008            | 2009            | 2010            | 2011            | 2012            |
|-------------------------------------|-----------------|-----------------|-----------------|-----------------|-----------------|
| TC [ $\mu\text{g}/\text{cm}^2$ ]    | $2.52 \pm 0.78$ |
| $f_{M,TC}$                          | $0.53 \pm 0.12$ |
| Cl <sup>-</sup> [ppb]               | $14.9 \pm 6.8$  | $8.1 \pm 1.1$   | $15.5 \pm 7.4$  | $19.6 \pm 0.1$  | -               |
| NO <sub>3</sub> <sup>-</sup> [ppb]  | $14.7 \pm 9.8$  | -               | $12.1 \pm 9.8$  | $43.7 \pm 14.7$ | $50.5 \pm 35.8$ |
| SO <sub>4</sub> <sup>2-</sup> [ppb] | $20.1 \pm 6.7$  | -               | $4.8 \pm 3.3$   | $8.6 \pm 1.1$   | $11.2 \pm 1.4$  |
| Ox <sup>2-</sup> [ppb]              | $1.7 \pm 0.6$   | -               | $0.7 \pm 0.3$   | -               | -               |
| Na <sup>-</sup> [ppb]               | $64.4 \pm 34.4$ | $2.5 \pm 1.0$   | $7.0 \pm 5.4$   | $2.3 \pm 2.2$   | -               |
| NH <sub>4</sub> <sup>+</sup> [ppb]  | -               | $1.1 \pm 0.1$   | $7.7 \pm 5.3$   | $1.6 \pm 0.7$   | -               |
| K <sup>+</sup> [ppb]                | $1.4 \pm 0.8$   | $2.3 \pm 1.0$   | $6.2 \pm 3.9$   | -               | -               |
| Mg <sup>2+</sup> [ppb]              | $5.0 \pm 2.0$   | -               | -               | -               | -               |
| Ca <sup>2+</sup> [ppb]              | $20.7 \pm 10.3$ | -               | $6.9 \pm 1.2$   | -               | -               |

**Table S3: Reference  $f_M$  values ( $f_{M,bio}$ ,  $f_{M,bb}$  and  $f_{NF,ref}$ ), which were used for correcting the elevated <sup>14</sup>C concentrations due to the above-ground thermo-nuclear bomb tests in the 1950ies and 1960ies (see Sect. 2.3.2).**

| year | $f_{M,bio}$       | $f_{M,bb}$       | $f_{NF,ref}$      |
|------|-------------------|------------------|-------------------|
| 2008 | $1.044 \pm 0.015$ | $1.127 \pm 0.05$ | $1.110 \pm 0.023$ |
| 2009 | $1.040 \pm 0.015$ | $1.122 \pm 0.05$ | $1.105 \pm 0.023$ |
| 2010 | $1.036 \pm 0.015$ | $1.117 \pm 0.05$ | $1.100 \pm 0.023$ |
| 2011 | $1.031 \pm 0.015$ | $1.111 \pm 0.05$ | $1.095 \pm 0.022$ |
| 2012 | $1.027 \pm 0.015$ | $1.106 \pm 0.05$ | $1.090 \pm 0.022$ |
